# Supplementary material for: 5-hydroxytryptamine receptor (5-HT1DR) promotes colorectal cancer metastasis by regulating Axin1/β-catenin/MMP-7 signaling pathway
Source: PubMed Central journal article supplement (PMC4694879; doi:10.18632/oncotarget.4543), 2015-07-17
Supplement: oncotarget-06-25975-s001.pdf [file oncotarget-06-25975-s001.pdf]

SUPPLEMENTARY FIGURES AND TABLES

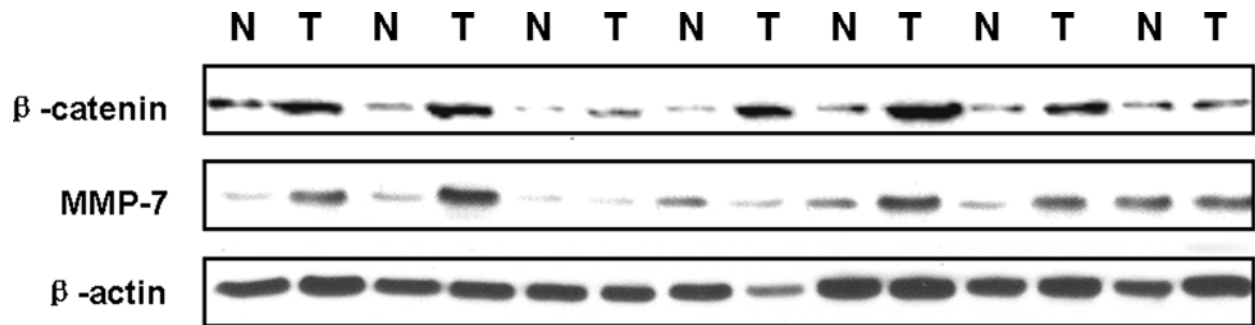

**Supplementary Figure S1:  $\beta$ -catenin and MMP-7 expression in CRC tissues.** Western blot analysis performed to detect the expression of  $\beta$ -catenin and MMP-7 in 7 pairs patient CRC tissues-matched normal tissues. The samples are higher-expressed of 5-HT<sub>1D</sub>R.

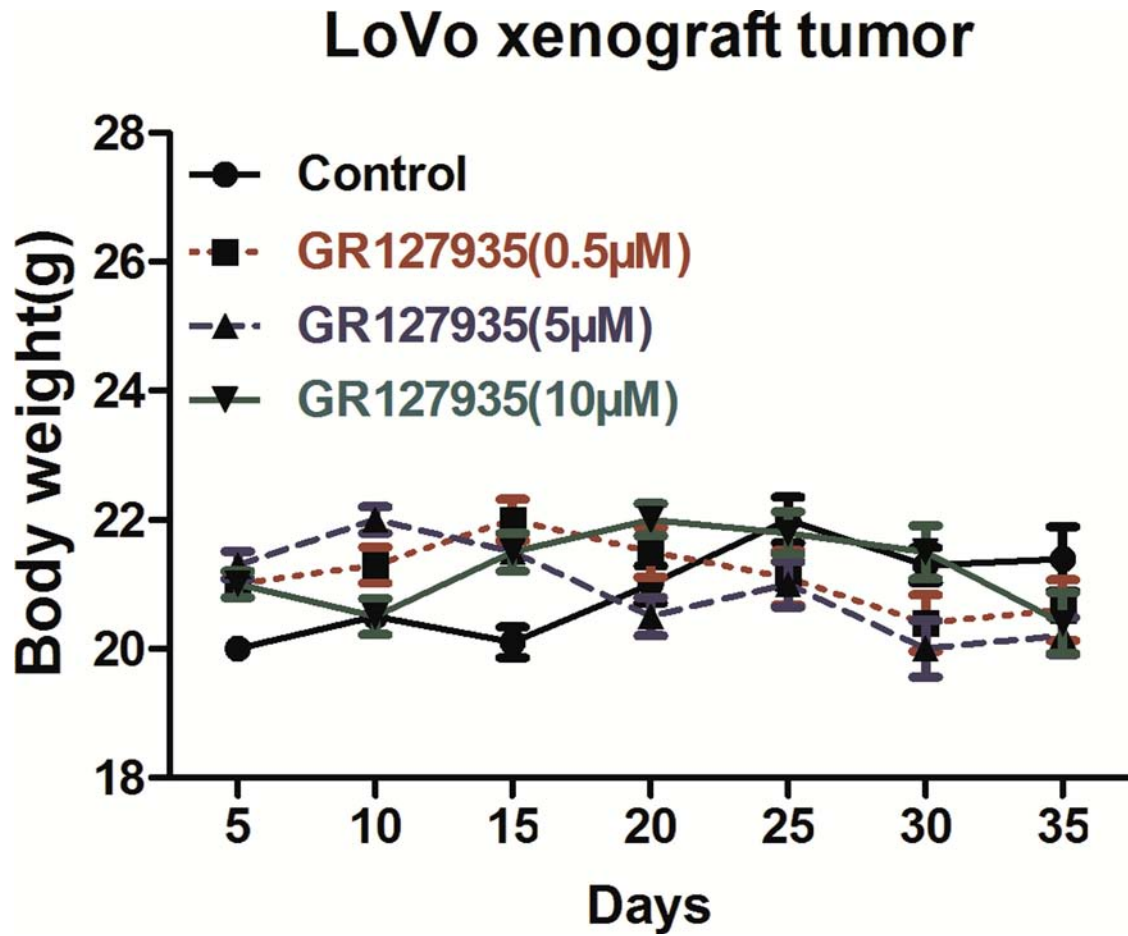

**Supplementary Figure S2: Body weights of mice.** Body weights of mice xenografted with LoVo cells and treated with 5-HT<sub>1D</sub>R antagonist (GR127935) in a does-dependent manner.

**Supplementary Table S1. Patient information for colorectal metastasis cancer**

| Characteristics | 5-HT <sub>1D</sub> R expression |                      | 5-HT <sub>3C</sub> R expression |                      | 5-HT <sub>4</sub> R expression |                      |
|-----------------|---------------------------------|----------------------|---------------------------------|----------------------|--------------------------------|----------------------|
|                 | Negative<br>(n = 22)            | Positive<br>(n = 68) | Negative<br>(n = 37)            | Positive<br>(n = 53) | Negative<br>(n = 43)           | Positive<br>(n = 47) |
| Gender          |                                 |                      |                                 |                      |                                |                      |
| Male            | 18                              | 42                   | 30                              | 30                   | 27                             | 33                   |
| Female          | 4                               | 26                   | 7                               | 23                   | 16                             | 14                   |
| Age/year        |                                 |                      |                                 |                      |                                |                      |
| >60             | 10                              | 39                   | 19                              | 30                   | 33                             | 16                   |
| ≤60             | 12                              | 29                   | 18                              | 23                   | 10                             | 31                   |
| Tumor size d/cm |                                 |                      |                                 |                      |                                |                      |
| <3              | 3                               | 2                    | 3                               | 2                    | 3                              | 2                    |
| ≥3 ~ <5         | 11                              | 33                   | 19                              | 25                   | 22                             | 22                   |
| ≥5              | 8                               | 33                   | 15                              | 26                   | 18                             | 23                   |
| TNM staging     |                                 |                      |                                 |                      |                                |                      |
| I               | 7                               | 6                    | 12                              | 1                    | 9                              | 4                    |
| II              | 13                              | 46                   | 21                              | 38                   | 31                             | 28                   |
| III             | 2                               | 16                   | 4                               | 14                   | 3                              | 15                   |
| IV              | 0                               | 0                    | 0                               | 0                    | 0                              | 0                    |
| AFP (ng/mL)     |                                 |                      |                                 |                      |                                |                      |
| <200            | 5                               | 15                   | 10                              | 10                   | 9                              | 11                   |
| ≥200            | 17                              | 53                   | 27                              | 43                   | 34                             | 36                   |
| CEA (ng/mL)     |                                 |                      |                                 |                      |                                |                      |
| <20             | 4                               | 9                    | 6                               | 7                    | 6                              | 7                    |
| ≥20             | 18                              | 59                   | 31                              | 46                   | 37                             | 40                   |
| Nodal status    |                                 |                      |                                 |                      |                                |                      |
| Positive        | 17                              | 59                   | 30                              | 46                   | 37                             | 39                   |
| Negative        | 5                               | 9                    | 7                               | 7                    | 6                              | 8                    |

**Supplementary Table S2. PCR primers**

| Gene             | Forward primer               | Reverse primer                |
|------------------|------------------------------|-------------------------------|
| Wnt2             | TGAGTCTCACCCTAGCCGCA         | ACTGGGAATCAGCCAGGGAGGGT       |
| MMP-7            | TGTATGGGGAACCTGCTGACA        | GCGTTCATCCTCATCGAAGT          |
| Akt              | ATGAGCGACGTGGCTATTGTGAAG     | GAGGCCGTCAGCCACAGTCTGGATG     |
| MAPK10           | CAGCTCTCTAAATTGACTCAG        | CCAATGGTTGGTTCCTACTGCAG       |
| APC              | ATTGTTATTAATTTTTTTGTTTGGTGGG | CGAACTACACCAATACAACCACATATC   |
| VEGF             | CTCTACCTTCCACCATGCCAAG       | AGACATCCATGAACTTCACCACTTC     |
| p53              | GTCTACCTCCCGCCATAA           | CATCTCCCAAACATCCCT            |
| SOX9             | ATCTGAAGAAGGAGAGCGAG         | CAAGCTCTGGAGACTGCTGA          |
| $\beta$ -catenin | AGGCATCCTCACCTGAAGTA         | CACACGCAGCTCATTGTAGA          |
| COX-2            | ATGCTGACTATGGCTACAAA         | TGATGCGTGAAGTGCTG             |
| CXCR4            | GCCAACGTCAGTGAGGCAGATG       | GAGGATGACTGTGGTCTTGAGG        |
| TICAM-1          | GGGAATTCATAATGGGTATCGGGAAGTC | GGCTGCAGGTTATATGTTTCATCTCAGGC |
| E-cadherin       | GAACGCATTGCCACATA            | GCACCTTCCATGACAGAC            |
| ABC2             | CCCTGAGAACTCCTTGAA           | TGCTGGATAGTCGGTGC             |
| ABC1             | TAATGCGACAGGAGATAGG          | TGCCATTGACTGAAAGAAC           |
| Bcl-xl           | GGTGCCACCTGTGGTCCACCTG       | GTTCACTGTTGGCCAGATAGG         |
| GAPDH            | GGTCGTATTGGGCGCCTGGTC        | TGACGGTGCCATGGAATTTGCCA       |
